1    **Developing an evaluation framework for public health**  
2    **environmental surveillance: Protocol for an international,**  
3    **multidisciplinary e-Delphi study**  
4    **Public Health Environmental Surveillance Evaluation Framework (PHES-**  
5    **EF)**

6    Douglas G. Manuel<sup>1,2,3,4\*</sup> (0000-0003-0912-0845), Carol Bennett<sup>1,2</sup> (0000-0002-3033-9860), Emma Brown<sup>1</sup>  
7    (0000-0002-0869-9907), David L. Buckeridge<sup>5</sup> (0000-0003-1817-5047), Yoni Freedhoff<sup>2</sup> (0000-0001-  
8    9391-3455), Sarah Funnell<sup>6</sup>, Farah Ishtiaq<sup>7</sup> (0000-0002-6762-7014), Matthew J. Wade<sup>8,9</sup> (0000-0001-  
9    9824-7121), David Moher<sup>3,10</sup> (0000-0003-2434-4206), on behalf of the PHES-EF Executive Group<sup>^</sup>

10    <sup>1</sup> Methodological and Implementation Research Program, Ottawa Hospital Research Institute, Ottawa,  
11    Ontario, Canada

12    <sup>2</sup> Department of Family Medicine, University of Ottawa, Ottawa, Ontario, Canada

13    <sup>3</sup> School of Epidemiology and Public Health, Faculty of Medicine, University of Ottawa, Ottawa, Ontario,  
14    Canada

15    <sup>4</sup> C.T. Lamont Primary Health Care Research Centre Program, Bruyère Research Institute, Ottawa,  
16    Ontario, Canada

17    <sup>5</sup> School of Population and Global Health, McGill University, Montreal, Quebec, Canada

18 <sup>6</sup> Department of Family Medicine, Faculty of Health Sciences, Queen's University, Kingston, Ontario,

19 Canada

20 <sup>7</sup>Tata Institute for Genetics and Society, National Centre for Biological Sciences, Bengaluru,

21 Karnataka, India

22 <sup>8</sup> Data Analytics and Surveillance Group, UK Health Security Agency, London, United Kingdom

23 <sup>9</sup> School of Engineering, Newcastle University, Newcastle-upon-Tyne, United Kingdom

24 <sup>10</sup> Centre for Journalology, Methodological and Implementation Research Program, Ottawa Hospital

25 Research Institute, Ottawa, Ontario, Canada

26 \*Corresponding Author

27 Email: [dmanuel@ohri.ca](mailto:dmanuel@ohri.ca) (DGM)

28 ^Membership of the PHES-EF Executive Group is provided in the Acknowledgments.

## 29 Metadata

## 30 Funding

31 This project is funded by the Canadian Institutes of Health Research-funded network, CoVaRR-Net

32 (Coronavirus Variants Rapid Response Network. FRN: 175622), and Health Canada (through the Safe

33 Restart Agreement Contribution Program. Arrangement #: 2223-HQ-000098). The Canadian Institutes of

34 Health Research and Health Canada have not been involved in the design or conduct of the study and

35 the views expressed herein do not necessarily represent the views of either funding organization.

## 36 Competing interests

37 The authors have declared that no competing interests exist.

## 38 Data availability

39 Anonymous aggregate data will be made publicly available when the study is completed and published.

## 40 Abstract

## 41 Introduction

42 Public health environmental surveillance has evolved, especially during the coronavirus disease  
43 pandemic, with wastewater-based surveillance being a prominent example. As surveillance methods  
44 diversify and expand, it is essential to have a robust evaluation of surveillance systems. This electronic  
45 Delphi study will propose an evaluation framework for public health environmental surveillance,  
46 informed by the expanding practice of wastewater-based surveillance during the pandemic.

## 47 Methods

48 The Public Health Environmental Surveillance Evaluation Framework (PHES-EF) will be developed in five  
49 steps. In Step 1, a multinational and multidisciplinary executive group will be formed to guide the  
50 framework development process. In Step 2, candidate items for Round 1 of the electronic Delphi will be  
51 generated by conducting relevant scoping reviews and consultation with the study executive group. In  
52 Step 3, an international electronic Delphi will be conducted over two rounds to develop consensus on  
53 items for the framework. In Step 4, the executive group will reconvene to finalize the evaluation  
54 framework, discuss standout items, and determine the dissemination strategies. Lastly, Step 5 will focus  
55 on disseminating the evaluation framework to all parties involved with or affected by wastewater-based  
56 surveillance using traditional and public-oriented methods.

## 57 Discussion

58 The electronic Delphi study will provide multidisciplinary and multinational consensus for the evaluation  
59 framework for public health environmental surveillance by providing a set of minimum criteria required

60 for their evaluation. The evaluation framework is intended to support the sustainability of  
61 environmental surveillance and improve its implementation, reliability, credibility, and value.

## 62 Introduction

63 Public health relies on robust surveillance systems to support informed decision-making and timely  
64 interventions [1]. Environmental-based surveillance, particularly wastewater-based testing, has  
65 historically informed public health responses to threats like typhoid, polio, and illicit drug use [2–6]. The  
66 coronavirus disease (Covid-19) pandemic marked a turning point, with an expansion of wastewater-  
67 based monitoring and surveillance to an unprecedented scale, highlighting its potential in broader public  
68 health contexts [7].

69 Building on the advances and experiences from Covid-19 wastewater-based surveillance (wastewater  
70 surveillance) during the pandemic, this study aims to develop a comprehensive evaluation framework.  
71 Wastewater surveillance will be an example; however, it will apply to broader public health  
72 environmental surveillance systems, including air and surface monitoring. Surveillance targets  
73 considered include infectious agents and health risks beyond Covid-19.

74 Wastewater surveillance, once a peripheral tool, gained prominence during the pandemic. Its global  
75 implementation in diverse settings [8], from metropolitan to rural areas [9,10], highlighted its strengths.  
76 These strengths include the provision of insights into disease spread, unaffected by clinical testing  
77 access or population health-seeking behaviours, and offering a non-invasive, resource-efficient  
78 surveillance method [11,12].

79 Despite these strengths, the widespread application of wastewater surveillance faces challenges  
80 [5,13,14]. Environmental variability affects measurement consistency, and the need for multidisciplinary  
81 collaboration brings logistic complexities [14]. Rapidly evolving methodologies have led to various  
82 analytic techniques and interpretation approaches, resulting in inconsistencies and uncertainties [7].

83 These challenges underscore the need for a structured evaluation framework. Such a framework can  
84 enhance accountability, transparency, and trust in wastewater surveillance systems, potentially  
85 improving surveillance performance and identifying best practices [1].

## 86 Study objectives

87 This project will use a multidisciplinary and multinational consensus approach to develop an evaluation  
88 framework for public health environmental surveillance (**Public Health Environmental Surveillance**  
89 **Evaluation Framework**, PHES-EF). An evaluation framework provides structured guidance to facilitate a  
90 systematic approach to the evaluation of the program [15–17]. See below for the study’s definition of an  
91 evaluation framework.

92 Specific objectives for the framework development process are as follows: (1) engage a multidisciplinary  
93 executive group of international experts to inform the development of the evaluation framework; (2)  
94 review the literature to identify current guidance on surveillance evaluation items; (3) prioritize items  
95 for an evaluation framework for environmental surveillance using an international electronic-Delphi (e-  
96 Delphi) process; (4) conduct a consensus meeting, which engages experts across disciplines, to create an  
97 evaluation framework for public health environmental surveillance based on feedback from the  
98 international e-Delphi process; and, (5) develop a comprehensive dissemination plan for the evaluation  
99 framework.

## 100 Definitions

101 We define key terms as follows:

- 102 • **Environmental surveillance:** Surveillance of substances or organisms in air, water, soil, and  
103 living organisms to detect changes or threats that may affect human health, ecosystems, or both  
104 [18].

- 105       • **Evaluation Framework:** A structured system or schema to systematically assess a program  
106       [1,15,17]. An evaluation framework presents a clear list of items or elements that should appear  
107       in an evaluation, such as constructs or concepts. It provides an organisation or structure for the  
108       list of items; defines how the list and organisation were developed; and, potentially, includes  
109       details about measuring the evaluation items. Importantly, an evaluation framework facilitates  
110       informed decision-making by providing a comprehensive understanding of program  
111       effectiveness and areas for improvement.
- 112       • **Public health surveillance:** The ongoing systematic collection, analysis, interpretation and  
113       dissemination of health data for the planning, implementation and evaluation of public health  
114       interventions and strategies to protect and improve the health of populations [19].
- 115       • **Wastewater:** Water that has been in contact with people (e.g., for washing) or used for  
116       cleansing and sanitation (e.g., for flushing away faecal matter), and is discharged via sewers or  
117       other sanitation systems [6].
- 118       • **Wastewater-based surveillance (wastewater surveillance):** A public health approach that  
119       examines specific substances or organisms in wastewater (sewage). Wastewater surveillance  
120       can be referred to as wastewater-based epidemiology; however, the latter can be specific to the  
121       use of wastewater to study and analyse the distribution, patterns, and determinants of health  
122       and disease conditions in defined populations [19].

## 123   Materials and methods

### 124   Study design

125   This protocol was developed *a priori*. The development of PHES-EF is guided by recommendations for  
126   Delphi techniques in the health sciences [20]. An overview of the study flow is detailed in Fig 1.



127 **Fig 1. Overview of the development process for PHES-EF.**

## 128 **Step 1: Establish the executive group**

129 A multinational and multidisciplinary executive group will oversee the development of the evaluation  
130 framework. The group will bring expertise from various fields, including public health, infectious disease,  
131 epidemiology; environmental and physical sciences; mathematical sciences; social sciences;  
132 communication, knowledge translation and exchange; knowledge users; and engaged public.

133 Content expert and knowledge user executive group members will be identified by examining relevant  
134 author lists, internet-based searching, and the study working group's professional networks. In contrast,  
135 the engaged member of the public will be identified through an open call for expressions of interest. The  
136 composition of the study executive group is detailed in S1 Table.

137 The executive group will be responsible for providing feedback on the framework development process  
138 (e.g., framework organization, completeness, additions, redundancy), supporting and advising working  
139 groups in their area of expertise, connecting the study to other related projects, recruiting e-Delphi  
140 panellists, participating in the consensus meeting, disseminating the evaluation framework, advising  
141 and/or participating in post-publication activities, and promoting the adoption of the evaluation  
142 framework among their professional networks. Co-chairs will also be responsible for decision-making  
143 when the executive group cannot reach consensus, leading executive group activities, and the overall  
144 framework development process. Any conflicts of interest among the research team, including executive  
145 group members, will be assessed before beginning the study.

## 146 Step 2: Generate candidate evaluation items

147 We will systematically compile a list of e-Delphi candidate items through three processes: scoping  
148 reviews, content analysis and extraction, and executive group consultation.

### 149 Scoping reviews

150 Two scoping reviews will be performed to provide a comprehensive view of public health environmental  
151 surveillance system evaluations. The first review will identify frameworks (e.g., sources which guide the  
152 planning, management, or conduct of processes) and criteria (e.g., principles on which a judgment may  
153 be based) for evaluating public health or environmental surveillance systems. The second review will  
154 explore insights from the Covid-19 pandemic, particularly focusing on the principles of equity, trust,  
155 open science, community engagement, and One Health in the context of wastewater surveillance [21–  
156 23]. Detailed protocols for the scoping reviews are available on OSF  
157 (<https://doi.org/10.17605/OSF.IO/GSKF6>; <https://doi.org/10.17605/OSF.IO/C9A3Q>). The completed  
158 scoping reviews will be reported following the Preferred Reporting Items for Systematic Reviews and  
159 Meta-Analyses extension for scoping reviews (PRISMA-ScR) [24].

### 160 Content analysis and extraction

161 We will conduct a content analysis on items identified during the data extraction phase for both scoping  
162 reviews. The content analyses will identify and group criteria for evaluating public health and  
163 environmental surveillance systems. In the first step, one team member will group all the extracted  
164 items into initial domains and themes. In the second step, two researchers will independently compare  
165 the category system of the first researcher to agree on the final category system consensually. In the  
166 third step, all criteria will be reviewed again to merge or modify duplicate concepts and create a  
167 parsimonious framework for the initial list of e-Delphi candidate items.

## 168 Executive group consultation

169 The executive group will review the initial list of e-Delphi candidate items and discuss the initial  
170 structure and presentation of Round 1 items. Their review will focus on creating an evidence-informed  
171 public health environmental surveillance framework centred around SARS-CoV-2 wastewater  
172 surveillance, and incorporating lessons learned from the pandemic (e.g., equity, open science,  
173 community engagement, and One Health). Additional items will be added if the executive group  
174 determines that key evaluation areas have not been addressed.

## 175 Step 3: International e-Delphi survey

176 A Delphi technique will be used to develop an internationally accepted evaluation framework for public  
177 health environmental surveillance. The Delphi method is an iterative multi-round approach that uses a  
178 series of sequential surveys, interspersed by controlled feedback, to elicit consensus among a group of  
179 individuals while maintaining anonymity [25,26]. An e-Delphi method will be used to overcome  
180 geographic barriers and allow us to engage panellists internationally across various time zones. Delphi  
181 surveys relating to health sciences have typically been conducted for 2-3 rounds [20,27,28]. Therefore, a  
182 two-round e-Delphi survey and a subsequent consensus meeting will be conducted to balance feasibility  
183 with rigour. Each round will be active for approximately 4-6 weeks to allow panellists sufficient time to  
184 participate in the survey while balancing study timeline constraints [29].

## 185 Recruitment of panellists

186 We will recruit a multinational, multidisciplinary panel of wastewater surveillance experts, knowledge  
187 users, and engaged members of the public to complete the e-Delphi survey. Content experts are adult  
188 individuals with knowledge in their respective subdiscipline groups (see S2 Table). Panellists will be  
189 selected to capture the multiple perspectives of those that influence the design, implementation,

190 evaluation, use, and reporting of wastewater surveillance activities, including the following  
191 subdisciplines groups: public health, infectious disease, epidemiology; environmental and physical  
192 sciences; mathematical sciences; social sciences; and communication, knowledge translation and  
193 exchange. Targeted recruitment will also be conducted to identify knowledge users and engaged  
194 members of the public. We will use purposive sampling to identify potentially eligible panellists by  
195 examining relevant author lists from the scoping reviews, professional networks, and internet-based  
196 searching, among other potential methods. Potential panellists may also be recruited using social media,  
197 a study website or calls for expressions of interest during relevant meetings, presentations, or  
198 correspondence. Snowball sampling may also be employed by executive group members and potential  
199 panellists to maximize recruitment.

200 Potentially eligible panellists will receive a recruitment email from the study working group, executive  
201 group members, or other potential panellists. A call for panellists to share the e-Delphi with other  
202 potentially eligible panellists may be included in recruitment materials and the e-Delphi survey.

203 Inclusion criteria for e-Delphi panellists are outlined in Table 1.

204 **Table 1. Eligibility criteria for e-Delphi survey panellists**

| Discipline group | Discipline subgroup                                                                                             | Inclusion criteria                                                                                                                                                                                                                                         |
|------------------|-----------------------------------------------------------------------------------------------------------------|------------------------------------------------------------------------------------------------------------------------------------------------------------------------------------------------------------------------------------------------------------|
| Content experts  | Public health, infectious disease, epidemiology<br>Environmental and physical sciences<br>Mathematical sciences | An adult <sup>a</sup> who is proficient in English and has a graduate degree in one of the listed specializations <sup>b</sup> , or $\geq 3$ years of professional experience, or $\geq 2$ peer-reviewed publications relating to wastewater surveillance. |

|                 |                                                                          |                                                                                                                                                                                                                                             |
|-----------------|--------------------------------------------------------------------------|---------------------------------------------------------------------------------------------------------------------------------------------------------------------------------------------------------------------------------------------|
|                 | Social sciences<br><br>Communication, knowledge translation and exchange |                                                                                                                                                                                                                                             |
| Knowledge users |                                                                          | An adult <sup>a</sup> who is proficient in English and who is a professional who does not have specialized training or qualifications in wastewater surveillance, but who uses surveillance to inform policy and action in their workplace. |
| Engaged public  |                                                                          | An adult <sup>a</sup> who is proficient in English and has relevant lived experience.                                                                                                                                                       |

205 Definitions: (1) Professional experience – Paid employment or professional practice in a listed specialization (current  
206 or former); (2) Graduate or professional degree – Master’s or Doctor of Philosophy (PhD) relating to a listed discipline  
207 subgroup.

208 <sup>a</sup>Adult: ≥ 18 years of age

209 <sup>b</sup>See S2 Table for specializations associated with each discipline.

210

211 We will conduct an all-rounds e-Delphi invitation approach, meaning panellists will be invited to every  
212 round regardless of whether they participated in the previous round [30]. Previous Delphi studies have  
213 commonly ranged from 20 to 30 panellists; however, there is no agreed upon standard [28,31]. Studies  
214 have also shown that the number of panellists and their diversity can impact the quality of outcomes  
215 [31]. Therefore, assuming only half of registered panellists will participate in at least one round, we will  
216 aim to recruit at least 50 panellists. Preferably, with at least 8-10 people per discipline subgroup. The  
217 study working group will monitor the distribution of registered panellists based on their demographic

218 information and will try to distribute appropriately across discipline subgroups and other demographic  
219 markers.

220 Registration to complete the e-Delphi will open approximately four weeks before the first round, and e-  
221 Delphi round surveys will be active for roughly 4-6 weeks. The tentative start and end dates for  
222 recruitment are 04/11/2024 and 21/02/2025, respectively. Recruitment or retention efforts will occur  
223 throughout each e-Delphi round and the four weeks of targeted recruitment before Round 1. Email  
224 reminders to complete the survey will be sent twice per e-Delphi round. Panellists may also receive up  
225 to two reminders to complete the screening questionnaire during the targeted recruitment period. The  
226 time required to complete each e-Delphi round survey will be approximately one hour. The estimated  
227 time commitment will be provided to all potential panellists during recruitment and before starting the  
228 consensus process.

### 229 **Panellist withdrawal or termination**

230 Panellists will not be able to withdraw from the study due to the safeguards in place to maintain  
231 anonymity; however, they may choose to stop actively participating in the study at any time.

### 232 **Panellist compensation**

233 Content experts and knowledge users who complete all rounds of the e-Delphi process will receive a  
234 \$100 CAD pre-paid Visa card in compensation for the time required to complete the e-Delphi process.  
235 Engaged members of the public who complete all rounds will be entered to win one of five \$100 CAD  
236 pre-paid Visa cards. Remuneration has been shown to encourage participation and retention from  
237 diverse groups, thereby minimizing bias, and motivating thoughtful, high-quality responses, thereby  
238 improving data quality [32].

## 239 Procedure

240 We will conduct a two-round e-Delphi survey to generate consensus on evaluation criteria (see Fig 2).

241 The full survey will be pre-tested and validated before administration. Summaries of Round 1 will be

242 compiled for the subsequent round.

243 **Fig 2. E-Delphi and consensus meeting methodology, methods to achieve consensus on core items for**

244 **PHES-EF.** Consensus: if  $\geq 70\%$  of panellist votes fall within the same category (irrelevant, equivocal,

245 relevant); no consensus if  $<70\%$  agreement. Item relevancy: *core item*: highly or moderately

246 relevant; *further discussion*: slightly relevant, neutral, slightly irrelevant; *excluded item*: moderately or

247 highly irrelevant.

248 We will use the Surveylet Delphi platform to administer the survey [33]. The platform facilitates

249 interactive dialogue between panellists by allowing them to justify their responses and comment on the

250 responses of others. Panellists can also save their progress and answer survey questions across multiple

251 sessions. Custom survey pathways will be generated for each panellist discipline subgroup (i.e.,

252 panellists from different discipline subgroups will be shown a different collection of candidate items).

253 Within each custom discipline subgroup survey pathway, panellists can skip items or self-declare that

254 they are not qualified to assess certain candidate items. To ensure the independent evaluation of items,

255 the order of candidate items may be randomized for each panellist.

256 Individuals will complete the screening questionnaire separate from the e-Delphi platform using

257 LimeSurvey [34]. The study working group will review eligibility, and if eligible to participate in the study,

258 individuals will receive an individualized link for anonymous participation in the e-Delphi survey. Implied

259 consent will be obtained electronically for all panellists using the Surveylet Delphi platform before

260 participation in the survey. Panellists who are eligible for compensation or wish to receive

261 acknowledgement for their contributions will be able to do so by clicking a link at the end of each survey

262 round. The link will bring them to a separate LimeSurvey form that will not be linked to their survey  
263 responses, allowing for e-Delphi responses to remain anonymous.

## 264 Defining consensus

265 We will use a 7-point Likert scale (1 = highly irrelevant to 7 = highly relevant). Panellist responses will be  
266 categorised as excluded item (irrelevant: 1–2), further discussion (equivocal: 3–5), or core item  
267 (relevant: 6–7). Consensus for each item is defined as  $\geq 70\%$  of the panellist votes falling within the  
268 same category (1–2, 3–5, or 6–7).

269 The approach to use a 7-point fully-labeled Likert scale – a higher number of categories compared to  
270 many studies – is informed by the consideration that panellists are professionals and engaged members  
271 of the public with good cognitive skills; therefore, more categories and labels will be more discriminating  
272 and reproducible [35–38]. The  $\geq 70\%$  consensus cut-off – a lower cut-off compared to many studies – is  
273 informed by the rapidly evolving nature of environmental surveillance for public health and the wide  
274 range of disciplines invited to the panel; therefore, a high level of agreement may not occur [35–38].

## 275 Stopping rules

276 When consensus is reached for a given item, no subsequent rounds of ranking for that item will be  
277 performed. Consensus items that are considered equivocal, in addition to remaining non-consensual  
278 items, will be further deliberated during the consensus meeting.

## 279 Round 1

280 Panellists will be invited to rate their level of agreement with candidate items generated from scoping  
281 review results and consultation with the study executive group. Free-text boxes will be included for  
282 panellists to provide feedback or identify additional candidate items to be included in the next e-Delphi  
283 survey round.



## 284 Round 2

285 Regardless of whether they participated in the previous round, panellists will be invited to participate in  
286 Round 2 of the e-Delphi survey. All panelists will be invited to rate new items and re-rate previous items  
287 that did not reach consensus. When re-rating their level of agreement, panellists will be presented with  
288 their previous round scores alongside the aggregate group results. Anonymous feedback from Round 1  
289 will also be compiled and presented during Round 2. Any newly suggested items during Round 2 will be  
290 deliberated on during the consensus meeting.

## 291 Summary panelist characteristics

292 At the start of the e-Delphi survey, panellists will provide basic demographic details to ascertain their  
293 discipline subgroup, ensuring they receive the correct list of candidate items. To maintain anonymity,  
294 this demographic data will not contain identifiable information, and only aggregate responses of 5 or  
295 more panelists will be analysed. We will report aggregate panel characteristics based on gender,  
296 discipline group or subgroup (depending on the number of panelists), level and type of experience,  
297 country income level, and World Bank work regions.

## 298 Quantitative analysis

299 We will report response rates, agreement levels, consensus, and stability across rounds using median,  
300 range, and IQR for each criterion item. The proportion of panelists who skipped items or selected “not  
301 qualified to respond” will be reported. Fisher’s exact test will be used to evaluate differences in item  
302 ratings by panellist characteristics: primary panellist disciplines (see S2 Table), country income level  
303 (high-income versus low-and-middle income), and World Bank world regions (see S3 Table).

## 304 Qualitative analysis

305 Content analyses will be conducted on panelists' feedback to extract common themes and insights. A  
306 summary will describe the evolution of each criterion across rounds, including reasons for item  
307 modification or elimination.

## 308 Grouping of subgroups

309 Subgroups with fewer than 5 panellists will be combined with similar groups based on panellist numbers  
310 and group likeness. Decisions on combined subgroups will be made prior to analyses of the items.

## 311 Exclusion of data

312 All panellists that participate in at least one round will have their responses included in analyses unless  
313 the study working group determines that a panellist's response warrants being excluded from analyses  
314 for reasons that are newly developed or not previously recognised.

## 315 Step 4: Consensus meeting

316 In preparation for the consensus meeting, the study working group will categorize the remaining  
317 candidate items for consideration into a preliminary evaluation framework. This will include merging  
318 and/or modifying the remaining items based on gathered feedback from the e-Delphi rounds.

319 An in-person or hybrid (in-person and online) consensus meeting will be held using the Surveylet Delphi  
320 survey platform after the results of the e-Delphi have been compiled and analysed. If in a hybrid format,  
321 Microsoft Teams will be used for messaging and videoconferencing. Video recording and transcription  
322 services may also be used to aid notetaking. The primary objective will be to achieve expert consensus  
323 on the final list of items for PHES-EF, through review and discussion of salient items. This process will be  
324 guided by the empirical evidence that was identified during the scoping reviews, and the opinions

325 gathered during the e-Delphi process. The secondary objective will be to discuss publication and  
326 dissemination strategies for the final evaluation framework.

327 Steps to produce the final list of items are as follows: (i) present the results of the e-Delphi exercise  
328 (name, rationale, and score of each item); (ii) discuss the rationale and relevance for including the items  
329 in the framework; and (iii) vote on equivocal and non-consensual items. We will invite all members of  
330 the executive group to participate in the consensus meeting. PHES-EF will be developed based on the  
331 final list of items that receive consensus during the executive group consensus meeting.

### 332 **Step 5: Dissemination of evaluation framework**

333 The dissemination of this evaluation framework will start with the publication of the PHES-EF protocol.  
334 The development of the evaluation framework will be reported in a statement document that will  
335 include the rationale and a brief description of the meeting and the panellists involved. While the  
336 publication strategy will be finalized based on the consensus meeting discussion, the preliminary  
337 approach will be to post to OSF, as a preprint, before publication in an open-access peer-reviewed  
338 journal. During this time, we will actively seek feedback from experts, knowledge users, and the public  
339 within our networks and via social media. PHES-EF will be made available using an open license (CC-BY-  
340 SA-4.0 license).

341 We will develop a website and may create a Discourse server or explore other social media platforms for  
342 ongoing user interactions. Active dissemination approaches will include presenting at relevant scientific  
343 conferences, holding webinars, and conducting workshops. Additional dissemination practices will be  
344 determined during the consensus meeting.

## 345 Equity, diversity, and inclusion (EDI)

346 “Equity is defined as the removal of systemic barriers and biases enabling all individuals to have equal  
347 opportunity to access and benefit from the program” [39]. To achieve this, members of the research  
348 team are committed to developing a strong understanding of the systemic barriers faced by individuals  
349 from underrepresented groups. “Diversity is defined as differences in race, colour, place of origin,  
350 religion, immigrant and newcomer status, ethnic origin, ability, sex, sexual orientation, gender identity,  
351 gender expression and age” [39]. Panellists will be asked to provide characteristic information (e.g.,  
352 country of residence, gender, primary discipline) to assess and help ensure (through more targeted  
353 recruitment) a large diversity in perspectives. “Inclusion is defined as the practice of ensuring that all  
354 individuals are valued and respected for their contributions and are equally supported” [39]. To help  
355 ensure that all research team members are integrated and supported, we will have a code of conduct  
356 statement in the executive group Terms of Reference.

357 All study working group members will complete EDI-related Canadian Institutes of Health Research  
358 (CIHR) training [40], and the First Nations Principles of OCAP<sup>®</sup> (Ownership, Control, Access, and  
359 Possession) training for research [41]. The executive group will receive an overview of EDI and OCAP<sup>®</sup>  
360 and will be encouraged and supported to complete such training. Furthermore, staff trained in EDI and  
361 OCAP<sup>®</sup> principles will review the framework from an EDI perspective to ensure appropriate language.

## 362 Knowledge user and public involvement

363 The international e-Delphi survey will collect responses from content experts, knowledge users, and  
364 engaged members of the public to ensure that all parties involved with or affected by wastewater  
365 surveillance are represented in the consensus-building approach. Apart from what has already been  
366 described, more detailed recruitment or public engagement methods may be informed by the executive

367 group engaged member of the public. Additionally, to ensure accurate and transparent reporting of  
368 knowledge user and public involvement throughout the study, we will refer to the Guidance for  
369 Reporting Involvement of Patients and the Public (GRIPP2) checklist [42]. We will document the  
370 methods used to engage knowledge users and members of the public, report the impacts and outcomes  
371 of their engagement, and report on lessons learned from the experience.

## 372 Acknowledgements

373 E-Delphi participation will not satisfy authorship criteria; however, panellists will have the option to  
374 receive individual acknowledgement for their contributions to the framework, given they provide  
375 consent to be named. Individuals who participate in the consensus meeting will have the opportunity to  
376 be named as authors.

## 377 Research data management

378 The project will follow an open-science approach and make available the data, code, and materials for  
379 all project stages, including the search strategy, search findings, initial curation of evaluation measures,  
380 summary of executive group discussions, e-Delphi processes, and agreement procedures. The  
381 management of research data will follow a data management and sharing plan.

382 All personal data will be managed using LimeSurvey. Personal data will only be collected from  
383 individuals during the screening questionnaire, and from panellists who wish to receive compensation  
384 and/or individual acknowledgement for their contributions to the evaluation framework. LimeSurvey  
385 data management practices are overseen by The Ottawa Hospital (TOH) Research Institute Methods  
386 Centre that protects privacy and confidentiality while assisting authorized users in collecting and  
387 managing survey data. LimeSurvey is a free, open-source, online survey tool. It has been installed on a  
388 TOH server in the TOH Demilitarized Zone and all data collected is stored in a TOH database within the

389 TOH firewall. LimeSurvey provides a streamlined process to build and manage online surveys. Users can  
390 create and publish surveys, collect responses, view analytics, and export survey data for further  
391 analysis. Because LimeSurvey is installed outside of the TOH firewall in the TOH Demilitarized Zone,  
392 surveys can be responded to from anywhere using an internet connection.

393 Calibrum's Surveylet Delphi platform will be used to manage e-Delphi responses. It may also be used for  
394 the consensus meeting. The e-Delphi will only collect anonymous data using a modified Delphi  
395 approach; meanwhile, the consensus meeting may collect identifiable data using a real-time Delphi  
396 approach. Surveylet complies with the EU-U.S. Privacy Shield Framework and Swiss-U.S. Privacy Shield  
397 Framework regarding the collection, use, and retention of personal information. The Surveylet platform  
398 also allows its users to be General Data Protection Regulation (GDPR) compliant. Calibrum's servers are  
399 protected by high-end firewall systems and vulnerability scans are conducted regularly. Calibrum uses  
400 Transport Layer Security (TLS) encryption (also known as HTTPS) for all transmitted data. Surveys are  
401 also protected with passwords and HTTP referrer checking. All data are encrypted at rest and hosted by  
402 SSAE-16 SOC II certified third-party data centres. Data on deprecated hard drives are destroyed by U.S.  
403 DOD methods and delivered to a third-party data destruction service.

#### 404 [Study record retention](#)

405 Any data that is exported from either survey company will be stored securely in a password protected  
406 location within TOH's SharePoint. Upon study completion, all study records will be retained securely for  
407 10 years, then destroyed as per the Ottawa Hospital Research Institute (OHRI) requirements.

#### 408 [Ethical considerations](#)

409 This study has received ethical approval (20230428-01H) from the Ottawa Health Science Network  
410 Research Ethics Board (OHSN-REB). Implied consent will be obtained from all panellists prior to

411 participating in the e-Delphi survey. Information about the survey and consent practices will be provided  
412 on the first page of the survey. Panellists will be informed that by providing their demographic  
413 information and proceeding to the next page, they are providing their implied consent to participate in  
414 the study.

415 Only anonymous panellist responses will be used for analyses. All panellist data and responses will be  
416 exported from relevant survey platforms to a shared folder on the Ottawa Hospital SharePoint. The  
417 shared folder contents will be password protected and only REB-approved study working group  
418 members from the Ottawa Hospital will have access to the data.

## 419 Discussion

420 This paper outlines the protocol for a two-round e-Delphi study that will be used to develop a  
421 multinational, multidisciplinary evaluation framework for public health environmental surveillance.  
422 Developing an evaluation framework will contribute to a better understanding of the ideal scope and  
423 use cases for wastewater surveillance and improve the reliability and credibility of surveillance data for  
424 public health officials. An evaluation framework will also help promote the sustainability of wastewater  
425 surveillance systems by providing an effective performance measurement tool.

426 We strove to design the PHES-EF protocol using a rigorous consensus approach. The development of the  
427 PHES-EF study protocol was informed by ACCORD (ACcurate COnsensus Reporting Document): A  
428 reporting guideline for consensus methods in biomedicine developed via a modified Delphi [43].  
429 Surveillance evaluation frameworks are uncommonly developed using a consensus approach. PHES-EF  
430 will be developed for environmental surveillance and informed by wastewater surveillance during the  
431 pandemic. However, associated scoping reviews and prior surveillance evaluation frameworks are

432 related largely to any public health surveillance system [44]. Therefore, PHES-EF may be applicable for  
433 evaluating public health surveillance beyond environmental systems.

## 434 Limitations

435 Although the Delphi technique uses a systematic process to generate consensus among a panel of  
436 experts, the method is not without its limitations. One of the primary concerns when using this  
437 technique is the ability to implement a truly representative expert panel. Despite our plan to use various  
438 recruitment methods to enroll panellists from all discipline subgroups with varying demographic  
439 characteristics, consensus results may ultimately be influenced by the final panel composition [45].

440 Another potential limitation in using a modified Delphi approach is the potential influence of controlled  
441 feedback on the convergence of panellist opinions. Although providing controlled feedback between  
442 survey rounds aids in generating consensus, this approach may bias consensus results by influencing  
443 individual panellists' opinions [46].

444 Furthermore, due to feasibility and resource limitations, only sources that are available in English will be  
445 included in associated scoping reviews. Additionally, only individuals who are proficient in English will be  
446 eligible to participate in the e-Delphi survey and consensus meeting. Therefore, the findings of this study  
447 may not reflect relevant knowledge that is not available in English.



## 448 Authors' contributions

449 **Conceptualization:** Douglas G. Manuel, Carol Bennett.

450 **Funding acquisition:** Douglas G. Manuel.

451 **Methodology:** Douglas G. Manuel, Carol Bennett, Emma Brown, David Moher.

452 **Supervision:** Douglas G. Manuel.

453 **Writing – original draft:** Douglas G. Manuel, Carol Bennett, Emma Brown.

454 **Writing – review and editing:** David Moher, Matthew J. Wade, Yoni Freedhoff, David L. Buckeridge,

455 Farah Ishtiaq, Sarah Funnell.

## 456 Acknowledgements

457 We thank Mary Jessome (PhD candidate, University of British Columbia) for her contributions to the  
458 study as a past executive group member with expertise in social sciences. We would also like to thank  
459 Peter Farrell (Research Librarian, University of Ottawa) for developing the associated scoping review  
460 search strategies for this study.

461 PHES-EF Executive Group (ordered alphabetically according to surname except for the first two  
462 authors):

463 Douglas G. Manuel\* (0000-0003-0912-0845), David L. Buckeridge\* (0000-0003-1817-5047), Yoni  
464 Freedhoff (0000-0001-9391-3455), Sarah Funnell, Bernd M. Gawlik (0000-0002-4406-5362), Farah  
465 Ishtiaq (0000-0002-6762-7014), Amy E. Kirby, Kerrigan McCarthy (0000-0001-8958-9795), David Moher

466 (0000-0003-2434-4206), Beate Sander (0000-0003-2128-9133), Jeremy Veillard, Matthew J. Wade

467 (0000-0001-9824-7121)

468 \*Co-chairs of PHES-EF Executive Group

## 469 Supporting information

470 **S1 Table. Executive group composition.** Note: The regional classifications are used by the World Bank  
471 for organizing economic data, development projects, and policy analysis. These classifications are not  
472 strictly geographical but also consider economic and developmental similarities and relationships.

473 **S2 Table. Executive group and e-Delphi panellist disciplines.** The list of specializations or related  
474 concepts is not extensive.

475 **S3 Table. World region classifications.** Note: The regional classifications are used by the World Bank for  
476 organizing economic data, development projects, and policy analysis. These classifications are not  
477 strictly geographical but also consider economic and developmental similarities and relationships.

## 478 References

- 479 1. Woodward G, Manuel DG, Goel V. Developing a balanced scorecard for public health. Toronto:  
480 Institute for Clinical Evaluative Sciences; 2004.
- 481 2. McClary-Gutierrez JS, Mattioli MC, Marcenac P, Silverman AI, Boehm AB, Bibby K, et al. SARS-CoV-2  
482 Wastewater Surveillance for Public Health Action. *Emerg Infect Dis.* 2021;27: e210753.  
483 doi:10.3201/eid2709.210753
- 484 3. Diamond MB, Keshaviah A, Bento AI, Conroy-Ben O, Driver EM, Ensor KB, et al. Wastewater  
485 surveillance of pathogens can inform public health responses. *Nat Med.* 2022;28: 1992–1995.  
486 doi:10.1038/s41591-022-01940-x
- 487 4. Ettore Zuccato, Chiara Chiabrando, Sara Castiglioni, Renzo Bagnati, Roberto Fanelli. Estimating  
488 Community Drug Abuse by Wastewater Analysis. *Environ Health Perspect.* 2008;116: 1027–1032.  
489 doi:10.1289/ehp.11022

- 490 5. Hruday SE, Bischel HN, Charrois J, Chik AHS, Conant B, Delatolla R, et al. Wastewater Surveillance for  
491 SARS-CoV-2 RNA in Canada. *FACETS*. 2022;7: 1493–1597. doi:10.1139/facets-2022-0148
- 492 6. World Health Organization. Environmental surveillance for SARS-COV-2 to complement public health  
493 surveillance. Geneva, Switzerland: World Health Organization; 2023 Sep p. 55. Available:  
494 <https://www.who.int/publications/i/item/9789240080638>
- 495 7. Manuel DG, Delatolla R, Fisman DN, Fuzzen M, Graber T, Katz GM, et al. The Role of Wastewater  
496 Testing for SARS-CoV-2 Surveillance. *Ontario COVID-19 Science Advisory Table*; 2021 Aug.  
497 doi:10.47326/ocsat.2021.02.40.1.0
- 498 8. Woytus A. What’s in the wastewater? In: St. Louis [Internet]. 22 Sep 2021 [cited 1 Jun 2023].  
499 Available: <https://www.stlmag.com/api/content/3f60d498-1b26-11ec-a8ea-1244d5f7c7c6/>
- 500 9. D’Aoust PM, Towhid ST, Mercier É, Hegazy N, Tian X, Bhatnagar K, et al. COVID-19 wastewater  
501 surveillance in rural communities: Comparison of lagoon and pumping station samples. *Sci Total*  
502 *Environ*. 2021;801: 149618. doi:10.1016/j.scitotenv.2021.149618
- 503 10. Shah S, Gwee SXW, Ng JQX, Lau N, Koh J, Pang J. Wastewater surveillance to infer COVID-19  
504 transmission: A systematic review. *Sci Total Environ*. 2022;804: 150060.  
505 doi:10.1016/j.scitotenv.2021.150060
- 506 11. Liu P, Ibaraki M, VanTassell J, Geith K, Cavallo M, Kann R, et al. A sensitive, simple, and low-cost  
507 method for COVID-19 wastewater surveillance at an institutional level. *Sci Total Environ*. 2022;807:  
508 151047. doi:10.1016/j.scitotenv.2021.151047
- 509 12. Larsen DA, Wigginton KR. Tracking COVID-19 with wastewater. *Nat Biotechnol*. 2020;38: 1151–1153.  
510 doi:10.1038/s41587-020-0690-1
- 511 13. Gretchen Vogel. Signals from the sewer—Measuring virus levels in wastewater can help track the  
512 pandemic. But how useful is that? *Science*. 9 Mar 2022;375. Available:  
513 [https://www.science.org/content/article/pandemic-signals-sewer-what-virus-levels-wastewater-](https://www.science.org/content/article/pandemic-signals-sewer-what-virus-levels-wastewater-tell-us)  
514 [tell-us](https://www.science.org/content/article/pandemic-signals-sewer-what-virus-levels-wastewater-tell-us). Accessed 1 Jun 2023.
- 515 14. Manuel D, Amadei CA, Campbell JR, Brault J, Zierler A, Veillard J. Strengthening Public Health  
516 Surveillance Through Wastewater Testing: An Essential Investment for the COVID-19 Pandemic  
517 and Future Health Threats. World Bank Group. The World Bank; 2022 pp. 1–67.
- 518 15. Fynn JF, Hardeman W, Milton K, Jones AP. A scoping review of evaluation frameworks and their  
519 applicability to real-world physical activity and dietary change programme evaluation. *BMC Public*  
520 *Health*. 2020: 1000. doi:<https://doi.org/10.1186/s12889-020-09062-0>
- 521 16. Nilsen P. Making sense of implementation theories, models, and frameworks. *Implement Sci* 30.  
522 2020; 53–79.
- 523 17. Calba C, Goutard FL, Hoinville L, Hendrikx P, Lindberg A, Saegerman C, et al. Surveillance systems  
524 evaluation: a systematic review of the existing approaches. *BMC Public Health*. 2015;15.  
525 doi:10.1186/S12889-015-1791-5

- 526 18. Andrews JR, Yu AT, Saha S, Shakya J, Aiemjoy K, Horng L, et al. Environmental Surveillance as a Tool  
527 for Identifying High-risk Settings for Typhoid Transmission. *Clin Infect Dis*. 2020;71: S71–S78.  
528 doi:10.1093/cid/ciaa513
- 529 19. Porta M. *A Dictionary of Epidemiology*. A Dictionary of Epidemiology. Oxford University Press; 2016.  
530 Available:  
531 [https://www.oxfordreference.com/display/10.1093/acref/9780199976720.001.0001/acref-](https://www.oxfordreference.com/display/10.1093/acref/9780199976720.001.0001/acref-9780199976720)  
532 [9780199976720](https://www.oxfordreference.com/display/10.1093/acref/9780199976720.001.0001/acref-9780199976720)
- 533 20. Spranger J, Homberg A, Sonnberger M, Niederberger M. Reporting guidelines for Delphi techniques  
534 in health sciences: A methodological review. *Z Evid Fortbild Qual Gesundh Wesen ZEFQ*. 172: 1–11.
- 535 21. How epidemiology has shaped the COVID pandemic. *Nature*. 2021;589: 491–492.  
536 doi:10.1038/d41586-021-00183-z
- 537 22. Devine D, Gaskell J, Jennings W, Stoker G. Trust and the Coronavirus Pandemic: What are the  
538 Consequences of and for Trust? An Early Review of the Literature. *Polit Stud Rev*. 2021;19: 274–  
539 285. doi:10.1177/1478929920948684
- 540 23. World Health Organization. Defining collaborative surveillance: a core concept for strengthening the  
541 global architecture for health emergency preparedness, response, and resilience (HEPR). Geneva:  
542 World Health Organization; 2023. Available: <https://iris.who.int/handle/10665/367927>
- 543 24. Tricco AC, Lillie E, Zarin W, O’Brien KK, Colquhoun H, Levac D, et al. PRISMA Extension for Scoping  
544 Reviews (PRISMA-ScR): Checklist and Explanation. *Ann Intern Med*. 2018;169: 467–473.  
545 doi:10.7326/M18-0850
- 546 25. Nasa P, Jain R, Juneja D. Delphi methodology in healthcare research: How to decide its  
547 appropriateness. *World J Methodol*. 2021;11: 116–129. doi:10.5662/wjm.v11.i4.116
- 548 26. Shang Z. Use of Delphi in health sciences research: A narrative review. *Medicine (Baltimore)*.  
549 2023;102: e32829. doi:10.1097/MD.00000000000032829
- 550 27. Guidance on Conducting and REporting DELphi Studies (CREDES) in palliative care:  
551 Recommendations based on a methodological systematic review. 2017;31: 684–706.
- 552 28. Niederberger M, Spranger J. Delphi Technique in Health Sciences: A Map. *Front Public Health*.  
553 2020;8: 457. doi:10.3389/fpubh.2020.00457
- 554 29. Schmalz U, Spinler S, Ringbeck J. Lessons Learned from a Two-Round Delphi-based Scenario Study.  
555 *MethodsX*. 2021;8: 101179. doi:10.1016/j.mex.2020.101179
- 556 30. Boel A, Navarro-Compán V, Landewé R, van der Heijde D. Two different invitation approaches for  
557 consecutive rounds of a Delphi survey led to comparable final outcome. *J Clin Epidemiol*.  
558 2021;129: 31–39. doi:10.1016/j.jclinepi.2020.09.034
- 559 31. Gattrell WT, Hungin AP, Price A, Winchester CC, Tovey D, Hughes EL, et al. ACCORD guideline  
560 for reporting consensus-based methods in biomedical research and clinical practice: a study  
561 protocol. 2022;7: 3.

- 562 32. Permeth-Wey J, Borenstein AR. Financial Remuneration for Clinical and Behavioral Research  
563 Participation: Ethical and Practical Considerations. *Ann Epidemiol.* 2009;19: 280–285.  
564 doi:10.1016/j.annepidem.2009.01.004
- 565 33. Surveylet. United States: Calibrium; Available: <https://calibrium.com>
- 566 34. LimeSurvey: An open source survey tool. Hamburg, Germany: LimeSurvey GmbH; Available:  
567 <https://www.limesurvey.org>
- 568 35. Diamond IR, Grant RC, Feldman BM, Pencharz PB, Ling SC, Moore AM, et al. Defining consensus: A  
569 systematic review recommends methodologic criteria for reporting of Delphi studies. *J Clin*  
570 *Epidemiol.* 2014;67: 401–409. doi:10.1016/j.jclinepi.2013.12.002
- 571 36. Belton I, MacDonald A, Wright G, Hamlin I. Improving the practical application of the Delphi method  
572 in group-based judgment: A six-step prescription for a well-founded and defensible process.  
573 *Technol Forecast Soc Change.* 2019;147: 72–82. doi:10.1016/j.techfore.2019.07.002
- 574 37. Weijters B, Cabooter E, Schillewaert N. The effect of rating scale format on response styles: The  
575 number of response categories and response category labels. *Int J Res Mark.* 2010;27: 236–247.  
576 doi:10.1016/j.ijresmar.2010.02.004
- 577 38. Lange T, Kopkow C, Lütznert J, Günther K-P, Gravius S, Scharf H-P, et al. Comparison of different  
578 rating scales for the use in Delphi studies: different scales lead to different consensus and show  
579 different test-retest reliability. *BMC Med Res Methodol.* 2020;20: 28. doi:10.1186/s12874-020-  
580 0912-8
- 581 39. Government of Canada. Best Practices in Equity, Diversity and Inclusion in Research. In: *New*  
582 *Frontiers in Research Fund* [Internet]. 22 Jun 2021. Available: [https://www.sshrc-](https://www.sshrc-crsh.gc.ca/funding-financement/nfrf-fnfr/edi-eng.aspx)  
583 [crsh.gc.ca/funding-financement/nfrf-fnfr/edi-eng.aspx](https://www.sshrc-crsh.gc.ca/funding-financement/nfrf-fnfr/edi-eng.aspx)
- 584 40. Government of Canada. Introduction to GBA Plus. 31 Mar 2021 [cited 1 Jun 2023]. Available:  
585 [https://women-gender-equality.canada.ca/gbaplus-course-cours-](https://women-gender-equality.canada.ca/gbaplus-course-cours-acsplus/eng/mod00/mod00_01_01.html)  
586 [acsplus/eng/mod00/mod00\\_01\\_01.html](https://women-gender-equality.canada.ca/gbaplus-course-cours-acsplus/eng/mod00/mod00_01_01.html)
- 587 41. The First Nations Information Governance Centre. The First Nations Principles of OCAP®. In: *The*  
588 *First Nations Information Governance Centre* [Internet]. 1 Jun 2023 [cited 1 Jun 2023]. Available:  
589 <https://fnigc.ca/ocap-training/>
- 590 42. Staniszewska S, Brett J, Simera I, Seers K, Mockford C, Goodlad S, et al. GRIPP2 reporting checklists:  
591 tools to improve reporting of patient and public involvement in research. *BMJ.* 2017;358: j3453.  
592 doi:10.1136/bmj.j3453
- 593 43. Gattrell WT, Logullo P, Zuuren EJ van, Price A, Hughes EL, Blazey P, et al. ACCORD (ACcurate  
594 COnsensus Reporting Document): A reporting guideline for consensus methods in biomedicine  
595 developed via a modified Delphi. *PLOS Med.* 2024;21: e1004326.  
596 doi:10.1371/journal.pmed.1004326

- 597 44. Yang L, Weston C, Cude C, Kincl L. Evaluating Oregon’s occupational public health surveillance  
598 system based on the CDC updated guidelines. *Am J Ind Med.* 2020;63: 713–725.  
599 doi:10.1002/ajim.23139
- 600 45. Winkler J, Moser R. Biases in future-oriented Delphi studies: A cognitive perspective. *Technol*  
601 *Forecast Soc Change.* 2016;105: 63–76. doi:10.1016/j.techfore.2016.01.021
- 602 46. Goodman CM. The Delphi technique: a critique. *J Adv Nurs.* 1987;12: 729–734. doi:10.1111/j.1365-  
603 2648.1987.tb01376.x
- 604

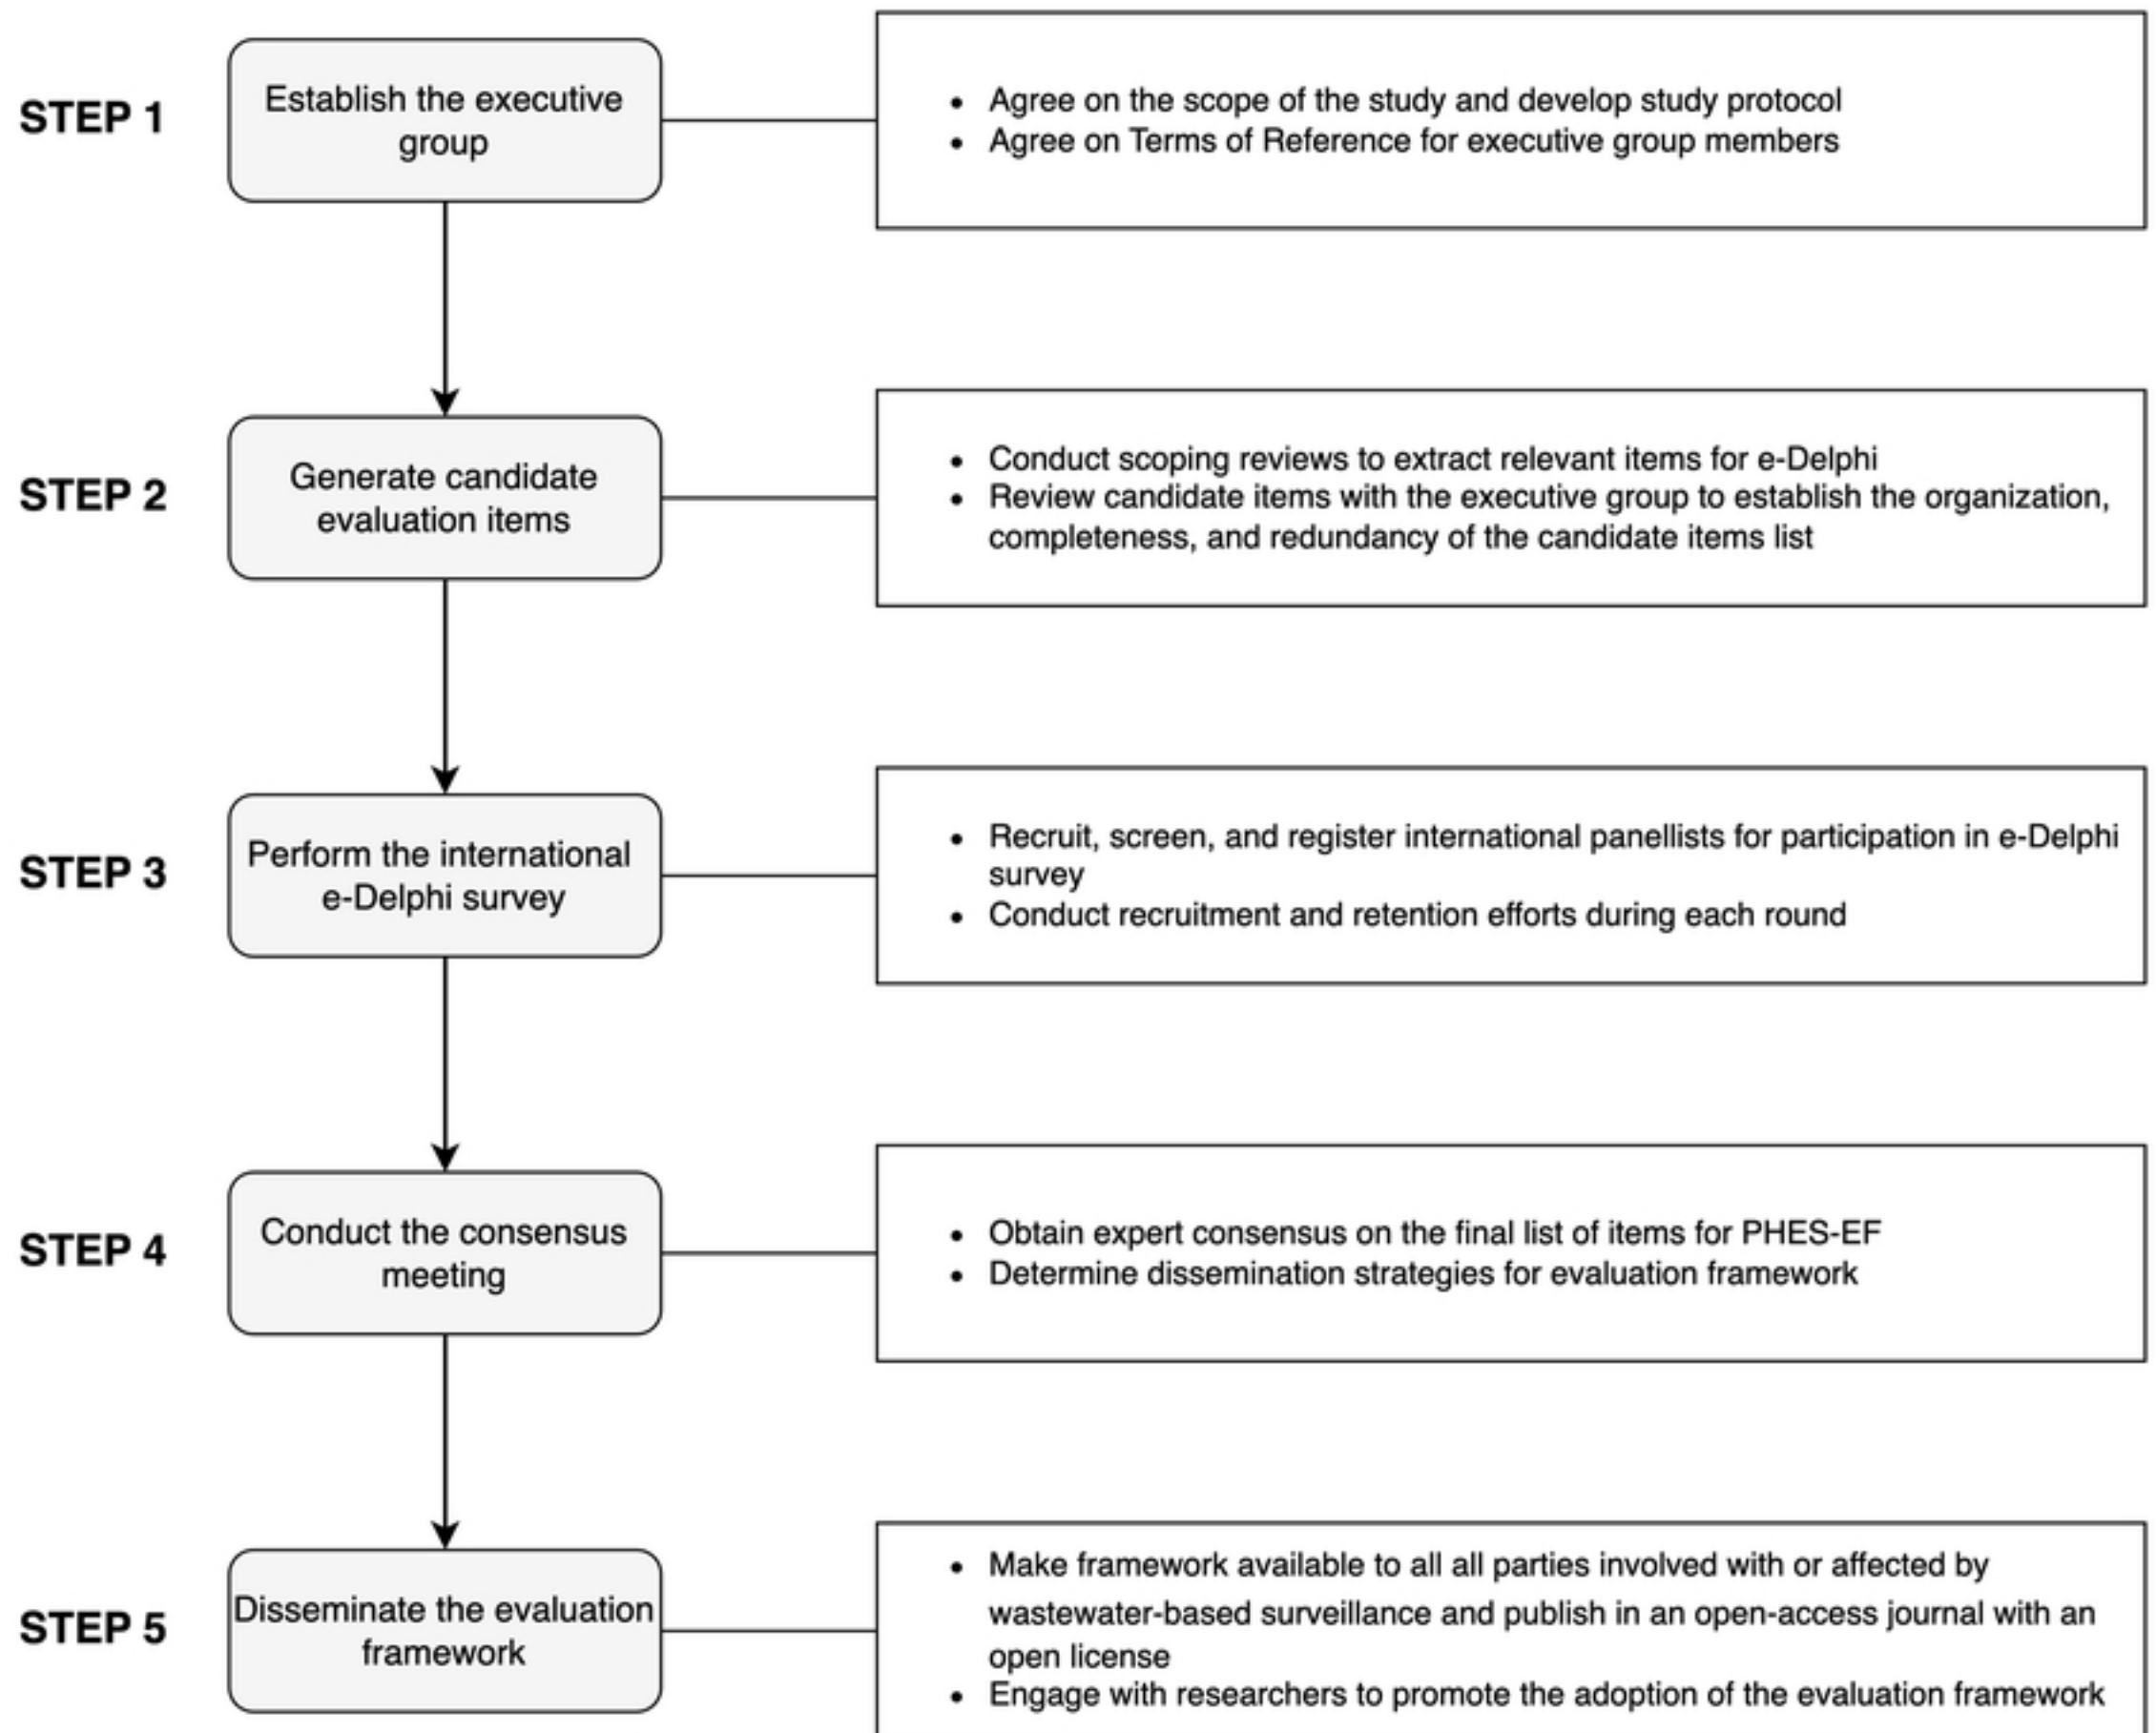

Figure 1

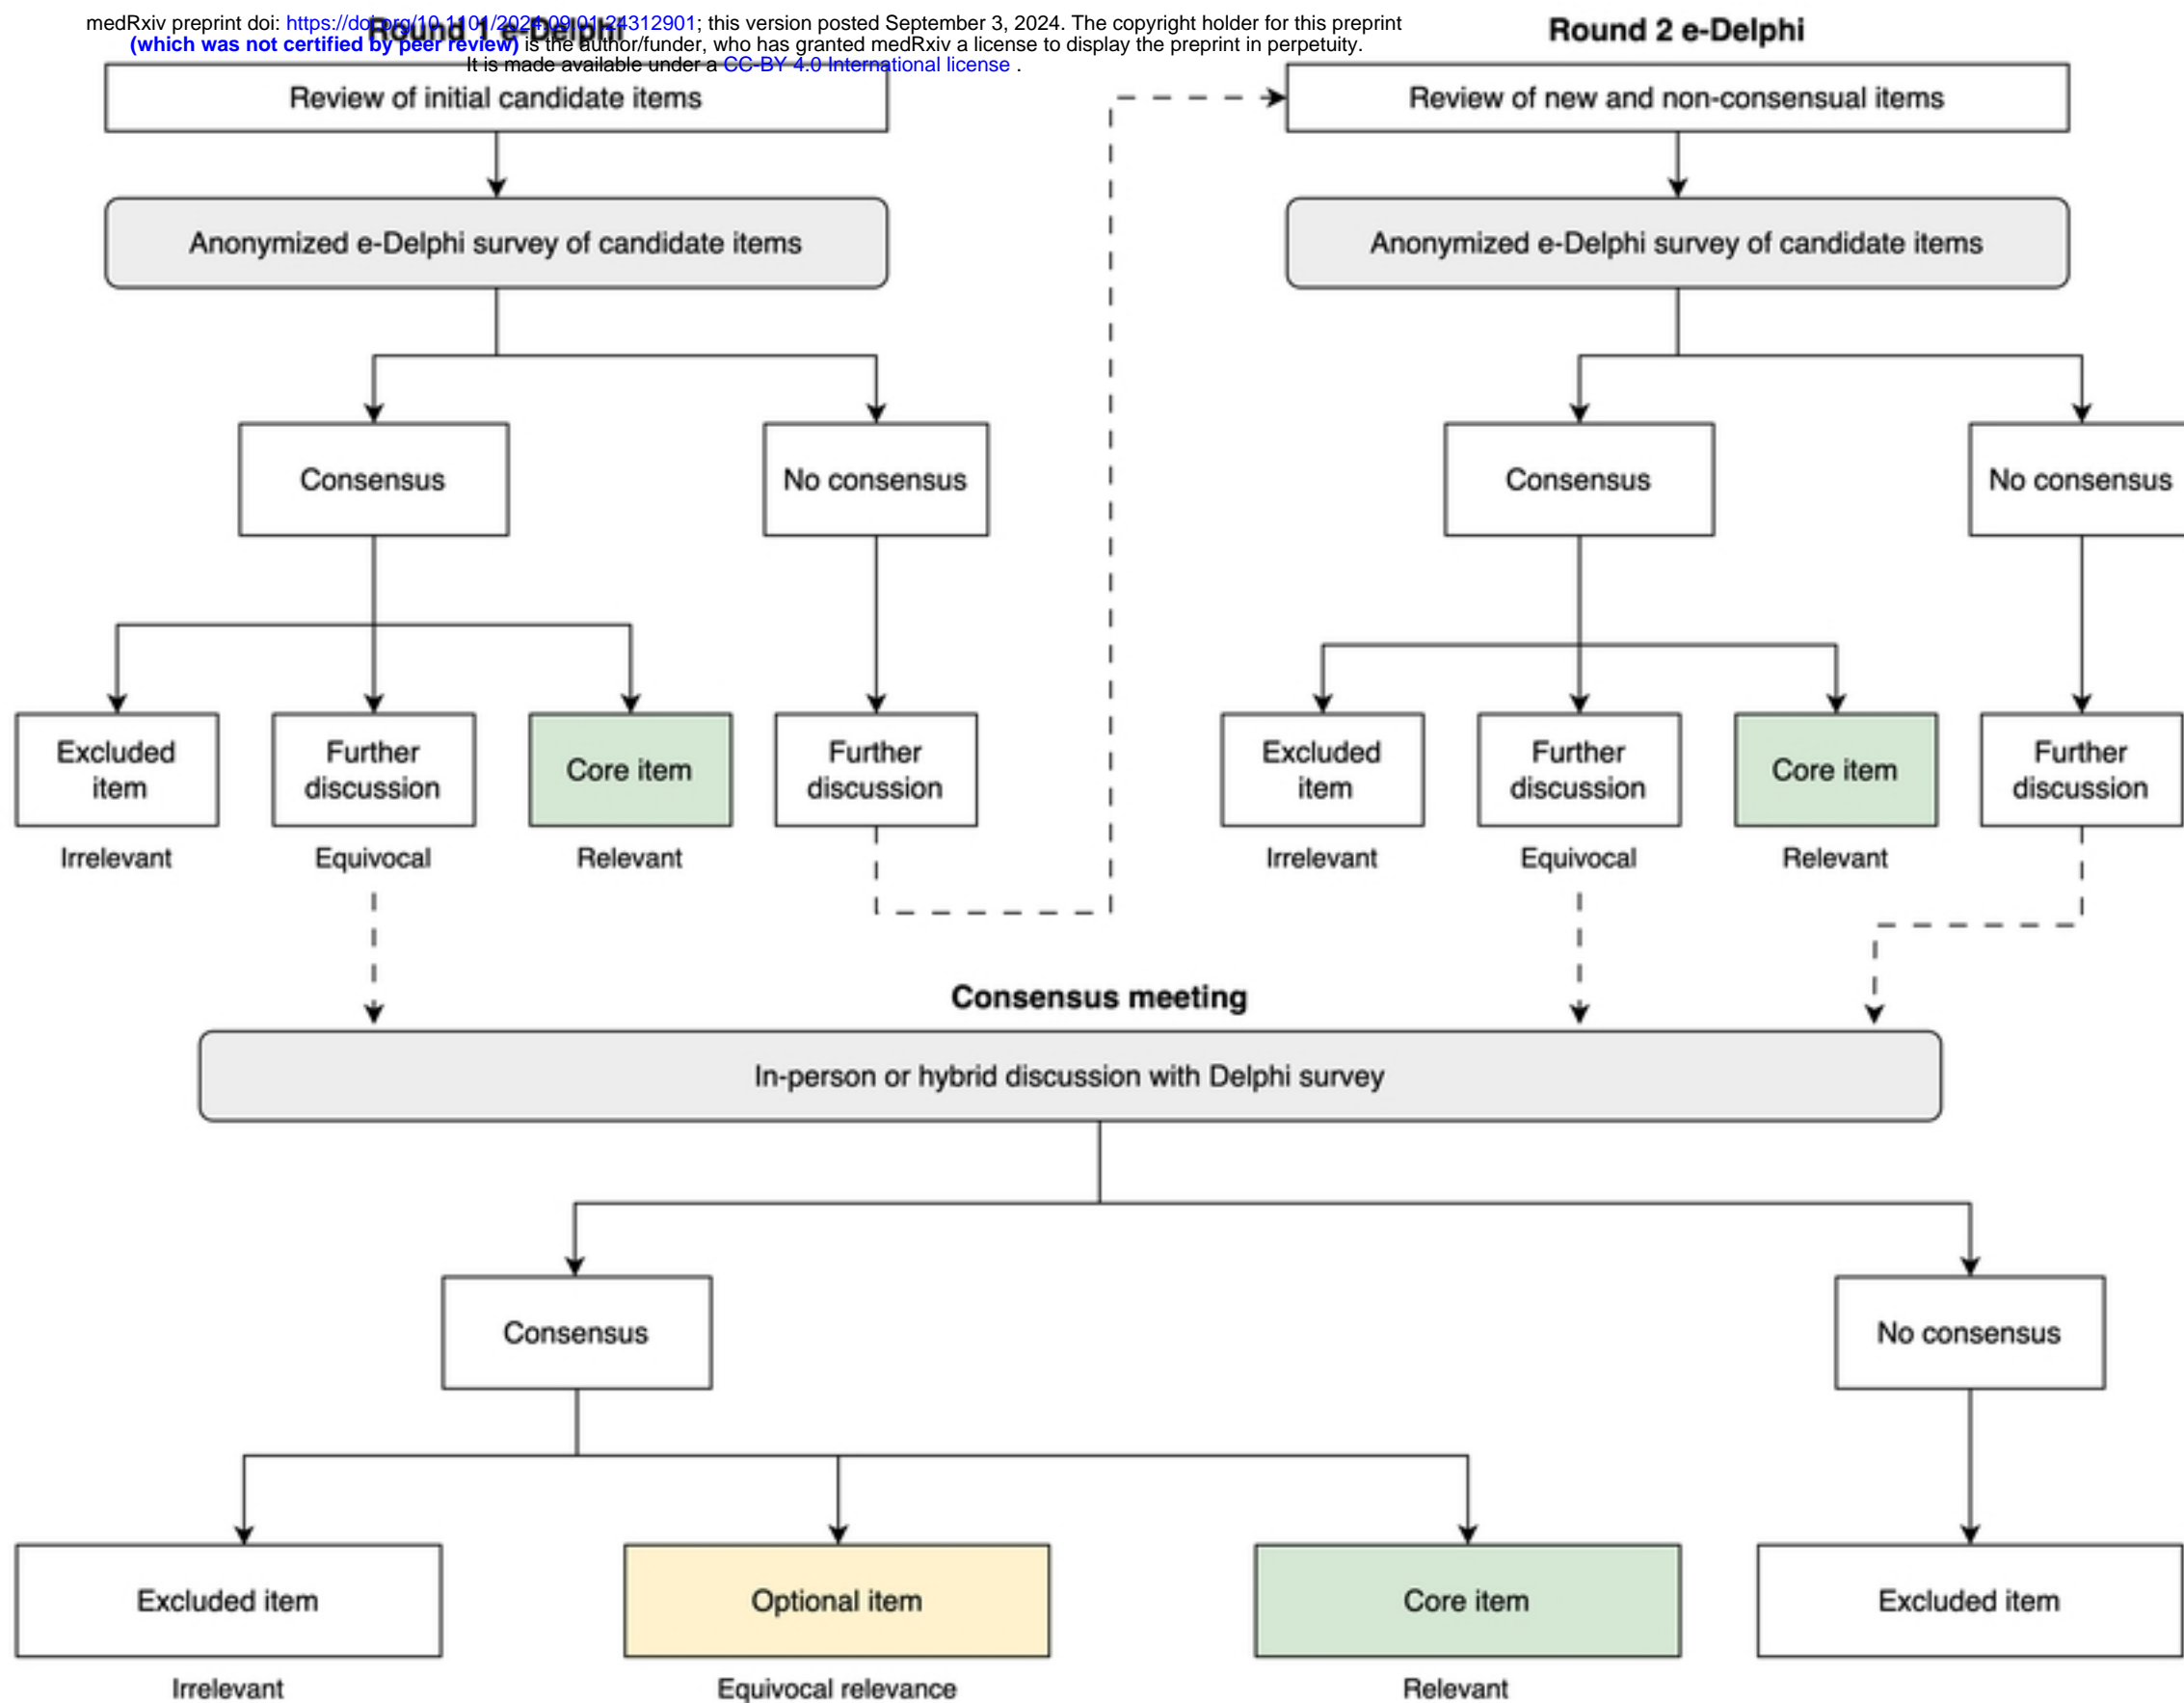

Figure 2
